# Supplementary material for: A Systematic Study of the Antioxidant Capacity of Humic Substances against Peroxyl Radicals: Relation to Structure
Source: MDPI journal article supplement (doi:10.3390/polym13193262), 2021-09-25
Supplement: s1 [file s1]

---

*Supplementary Materials*

# **A Systematic Study of the Antioxidant Capacity of Humic Substances against Peroxyl Radicals: Relation to Structure**

Olga I. Klein <sup>1</sup>, Natalia A. Kulikova <sup>1,2,\*</sup>, Andrey I. Konstantinov <sup>3</sup>, Maria V. Zykova <sup>4</sup> and Irina V. Perminova <sup>3</sup>

**Table S1.** Pearson correlation coefficients between physical-chemical HS properties and their AOC<sup>1</sup>.

|                                     | AOC          | O/C          | H/C          | C/N          | C <sub>C=O</sub> | C <sub>COO</sub> | C <sub>ArO</sub> | C <sub>Ar</sub> | C <sub>OCO</sub> | C <sub>CHO</sub> | C <sub>CH2O</sub> | C <sub>CH3O</sub> | C <sub>CHn</sub> | ΣC <sub>Ar</sub> | ΣC <sub>Carb</sub> | ΣC <sub>Alk</sub> | ΣC <sub>Alk-O</sub> | ΣC <sub>Ar</sub> /ΣC <sub>Alk</sub> | TP   |
|-------------------------------------|--------------|--------------|--------------|--------------|------------------|------------------|------------------|-----------------|------------------|------------------|-------------------|-------------------|------------------|------------------|--------------------|-------------------|---------------------|-------------------------------------|------|
| AOC                                 | 1.00         |              |              |              |                  |                  |                  |                 |                  |                  |                   |                   |                  |                  |                    |                   |                     |                                     |      |
| O/C                                 | 0.36         | 1.00         |              |              |                  |                  |                  |                 |                  |                  |                   |                   |                  |                  |                    |                   |                     |                                     |      |
| H/C                                 | 0.08         | 0.21         | 1.00         |              |                  |                  |                  |                 |                  |                  |                   |                   |                  |                  |                    |                   |                     |                                     |      |
| C/N                                 | <b>0.65</b>  | 0.18         | -0.14        | 1.00         |                  |                  |                  |                 |                  |                  |                   |                   |                  |                  |                    |                   |                     |                                     |      |
| C <sub>C=O</sub>                    | 0.11         | <b>0.42</b>  | 0.21         | 0.00         | 1.00             |                  |                  |                 |                  |                  |                   |                   |                  |                  |                    |                   |                     |                                     |      |
| C <sub>COO</sub>                    | -0.29        | 0.23         | -0.11        | -0.11        | 0.24             | 1.00             |                  |                 |                  |                  |                   |                   |                  |                  |                    |                   |                     |                                     |      |
| C <sub>ArO</sub>                    | -0.39        | -0.17        | 0.05         | -0.16        | -0.21            | 0.13             | 1.00             |                 |                  |                  |                   |                   |                  |                  |                    |                   |                     |                                     |      |
| C <sub>Ar</sub>                     | -0.19        | <b>-0.73</b> | <b>-0.64</b> | 0.03         | <b>-0.42</b>     | -0.22            | 0.22             | 1.00            |                  |                  |                   |                   |                  |                  |                    |                   |                     |                                     |      |
| C <sub>OCO</sub>                    | <b>0.44</b>  | 0.37         | 0.37         | 0.17         | <b>0.43</b>      | <b>-0.45</b>     | -0.33            | <b>-0.51</b>    | 1.00             |                  |                   |                   |                  |                  |                    |                   |                     |                                     |      |
| C <sub>CHO</sub>                    | <b>0.46</b>  | <b>0.52</b>  | <b>0.40</b>  | 0.13         | -0.04            | -0.39            | -0.34            | <b>-0.65</b>    | <b>0.68</b>      | 1.00             |                   |                   |                  |                  |                    |                   |                     |                                     |      |
| C <sub>CH2O</sub>                   | 0.10         | 0.32         | <b>0.53</b>  | -0.14        | 0.03             | <b>-0.45</b>     | -0.15            | <b>-0.60</b>    | <b>0.65</b>      | <b>0.74</b>      | 1.00              |                   |                  |                  |                    |                   |                     |                                     |      |
| C <sub>CH3O</sub>                   | <b>-0.56</b> | -0.27        | 0.37         | <b>-0.40</b> | -0.03            | -0.10            | 0.38             | 0.02            | -0.06            | -0.23            | 0.31              | 1.00              |                  |                  |                    |                   |                     |                                     |      |
| C <sub>CHn</sub>                    | 0.00         | 0.05         | 0.06         | 0.04         | -0.08            | 0.30             | -0.29            | -0.10           | <b>-0.50</b>     | -0.24            | -0.31             | -0.24             | 1.00             |                  |                    |                   |                     |                                     |      |
| ΣC <sub>Ar</sub>                    | -0.27        | <b>-0.72</b> | <b>-0.58</b> | -0.01        | <b>-0.44</b>     | -0.18            | <b>0.43</b>      | <b>0.98</b>     | <b>-0.54</b>     | <b>-0.68</b>     | -0.59             | 0.11              | -0.16            | 1.00             |                    |                   |                     |                                     |      |
| ΣC <sub>Carb</sub>                  | <b>0.46</b>  | <b>0.50</b>  | <b>0.44</b>  | 0.12         | 0.10             | <b>-0.45</b>     | -0.35            | <b>-0.67</b>    | <b>0.83</b>      | <b>0.97</b>      | <b>0.81</b>       | -0.14             | -0.35            | <b>-0.69</b>     | 1.00               |                   |                     |                                     |      |
| ΣC <sub>Alk</sub>                   | 0.39         | <b>0.52</b>  | <b>0.59</b>  | 0.07         | 0.07             | -0.38            | <b>-0.44</b>     | <b>-0.77</b>    | <b>0.66</b>      | <b>0.90</b>      | <b>0.81</b>       | -0.06             | 0.04             | <b>-0.82</b>     | <b>0.91</b>        | 1.00              |                     |                                     |      |
| ΣC <sub>Alk-O</sub>                 | 0.36         | <b>0.45</b>  | <b>0.52</b>  | 0.05         | 0.10             | <b>-0.47</b>     | -0.28            | <b>-0.67</b>    | <b>0.83</b>      | <b>0.93</b>      | <b>0.87</b>       | 0.05              | <b>-0.40</b>     | <b>-0.68</b>     | <b>0.98</b>        | <b>0.90</b>       | 1.00                |                                     |      |
| ΣC <sub>Ar</sub> /ΣC <sub>Alk</sub> | -0.27        | <b>-0.71</b> | <b>-0.64</b> | 0.05         | -0.35            | 0.06             | 0.37             | <b>0.94</b>     | <b>-0.61</b>     | <b>-0.76</b>     | <b>-0.70</b>      | 0.02              | -0.13            | <b>0.95</b>      | <b>-0.78</b>       | <b>-0.91</b>      | <b>-0.78</b>        | 1.00                                |      |
| TP                                  | <b>0.64</b>  | -0.02        | 0.10         | 0.23         | 0.19             | <b>-0.54</b>     | <b>-0.46</b>     | 0.09            | 0.27             | 0.12             | 0.08              | -0.19             | 0.17             | -0.02            | 0.07               | 0.23              | 0.14                | -0.12                               | 1.00 |

<sup>1</sup> The values in bold denote statistically significant correlation coefficients at  $p < 0.05$ .

H/C, O/C and N/C ratios are calculated on ash- and water-free basis.

Content of carbon in the structural fragments is determined by <sup>13</sup>C NMR spectroscopy as the integral intensity (%) of the following spectral regions (ppm): 220–189 (C<sub>C=O</sub>), 189–168 (C<sub>COO</sub>), 168–145 (C<sub>ArO</sub>), 145–108 (C<sub>Ar</sub>), 108–91 (C<sub>OCO</sub>), 91–66 (C<sub>CHO</sub>), 66–59 (C<sub>CH2O</sub>), 59–48 (C<sub>CH3O</sub>), 48–0 (C<sub>CHn</sub>).

TP is measured in μmol TE mg<sup>-1</sup>.
